# Supplementary material for: The Role of the Wnt Pathway in VEGF/Anti-VEGF-Dependent Control of the Endothelial Cell Barrier
Source: PubMed Central journal article supplement — Invest Ophthalmol Vis Sci. 2021 Sep 20;62(12):17. doi: 10.1167/iovs.62.12.17 (PMC8458780; doi:10.1167/iovs.62.12.17), 2021-09-20
Supplement: iovs-62-12-17_s001.pdf [file iovs-62-12-17_s001.pdf]

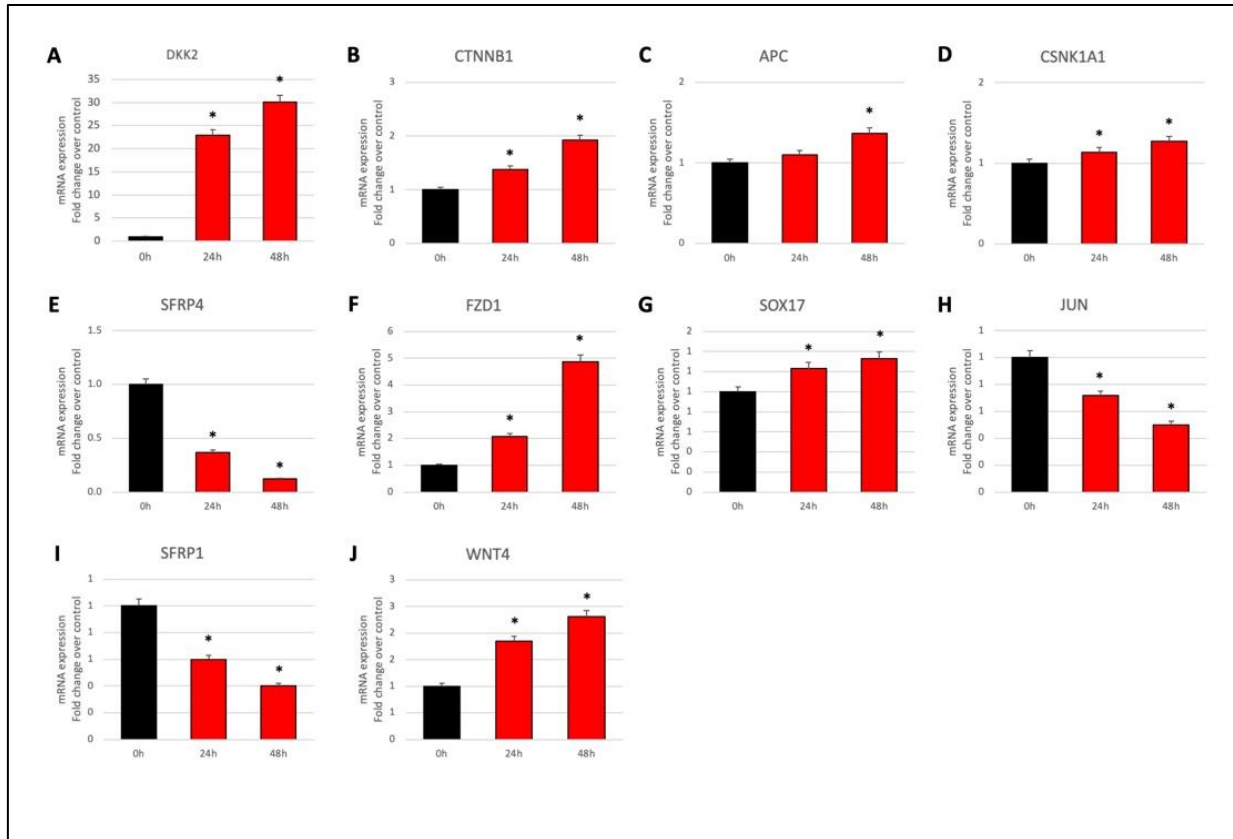

**Figure S1. VEGF induced durable changes in expression of genes within the Wnt pathway.** Triplicate dishes of HG HRECs that were treated for the indicated duration with 1 nM VEGF were harvested, RNA was extracted and subjected to qRT-PCR using primers specific for the indicated gene. Data are mean  $\pm$  SD, n=3. The level of expression in unstimulated cells (black bars) was set to 1.0. For VEGF-treated cells (red bars) the data are expressed as fold increase over unstimulated cells; \* p<0.05. Similar results were observed in at least 3 independent experiments.
