# Supplementary material for: The Role of the Wnt Pathway in VEGF/Anti-VEGF-Dependent Control of the Endothelial Cell Barrier
Source: PubMed Central journal article supplement — Invest Ophthalmol Vis Sci. 2021 Sep 20;62(12):17. doi: 10.1167/iovs.62.12.17 (PMC8458780; doi:10.1167/iovs.62.12.17), 2021-09-20
Supplement: iovs-62-12-17_s002.pdf [file iovs-62-12-17_s002.pdf]

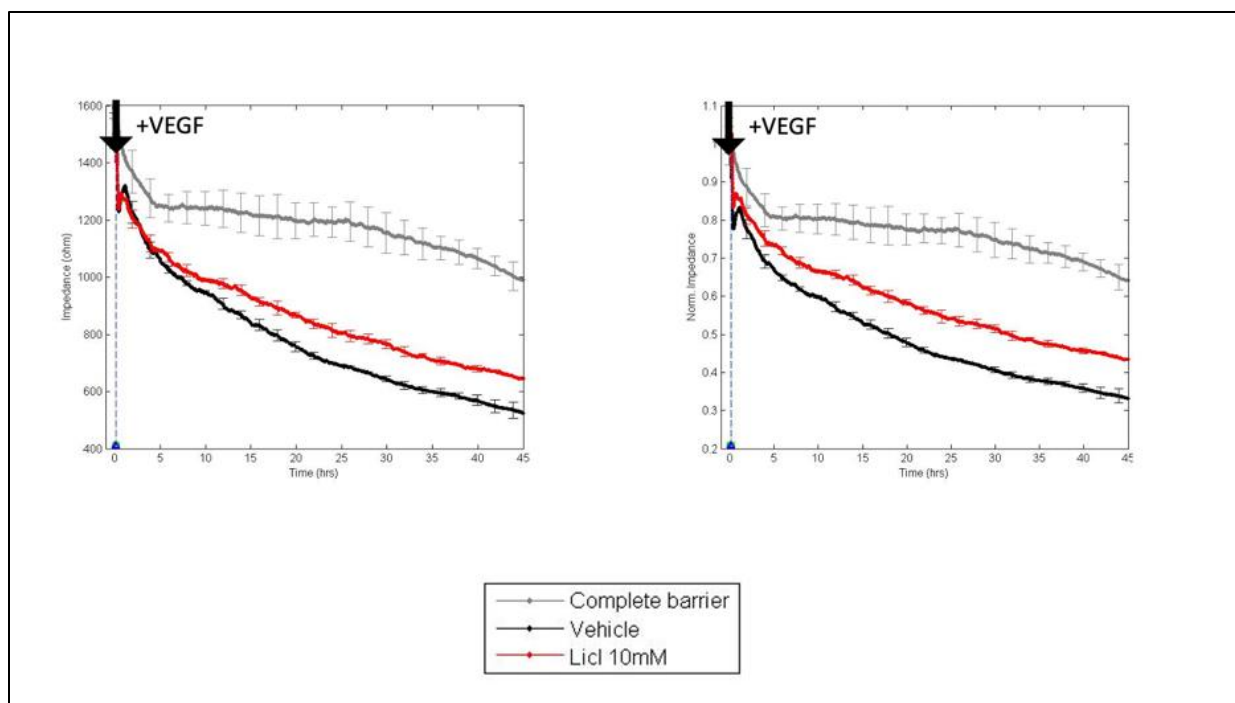

**Figure S2. Activators of the Wnt pathway did not prevent durable relaxation of the barrier in response to continued exposure to VEGF.** The transendothelial electrical resistance (TEER) of confluent monolayers of HG HRECs was measured by electrical cell-substrate impedance sensing (ECIS) for 45 h following the addition of VEGF to cells that had been pretreated with either LiCl vehicle (dH<sub>2</sub>O; black), or LiCl (10 mM; red). The gray line is the response of cells that were not treated with VEGF. The two panels show the results of two independent experiments.
