# Supplementary material for: The Role of the Wnt Pathway in VEGF/Anti-VEGF-Dependent Control of the Endothelial Cell Barrier
Source: PubMed Central journal article supplement — Invest Ophthalmol Vis Sci. 2021 Sep 20;62(12):17. doi: 10.1167/iovs.62.12.17 (PMC8458780; doi:10.1167/iovs.62.12.17), 2021-09-20
Supplement: iovs-62-12-17_s003.pdf [file iovs-62-12-17_s003.pdf]

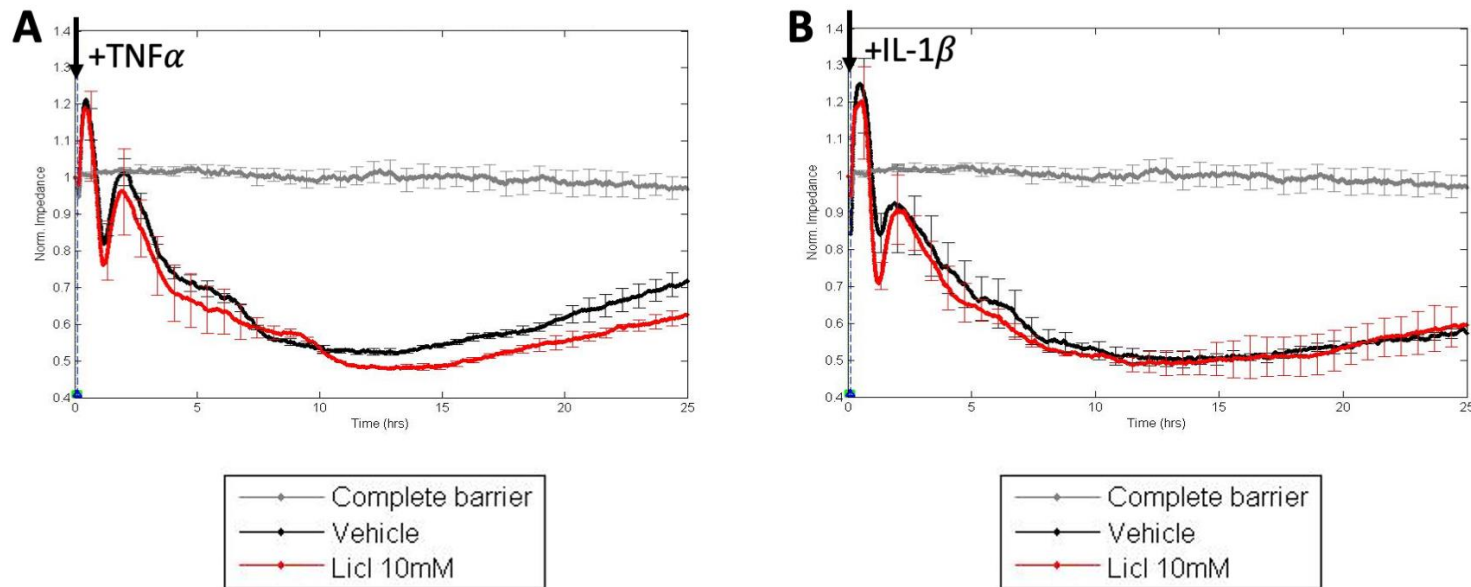

**Figure S3. LiCl did not attenuate cytokine-driven relaxation of the endothelial barrier.**

HG HRECs were pre-treated for 48 h with vehicle (black trace) or 10 mM LiCl (red trace), then 20 ng/ml  $TNF\alpha$  (**A**) or  $IL-1\beta$  (**B**) was added, and the transendothelial electrical resistance (TEER) was recorded for 25 h. The gray trace is the response of cells that were pretreated with vehicle (dH<sub>2</sub>O) and not stimulated with either of the cytokines. Data were normalized to the initial TEER, which was measured at the 0 h time point. Similar results were observed in at least three independent experiments. Data are expressed as the mean  $\pm$  SD for a single representative experiment.
