# Supplementary material for: The Role of the Wnt Pathway in VEGF/Anti-VEGF-Dependent Control of the Endothelial Cell Barrier
Source: PubMed Central journal article supplement — Invest Ophthalmol Vis Sci. 2021 Sep 20;62(12):17. doi: 10.1167/iovs.62.12.17 (PMC8458780; doi:10.1167/iovs.62.12.17), 2021-09-20
Supplement: iovs-62-12-17_s004.pdf [file iovs-62-12-17_s004.pdf]

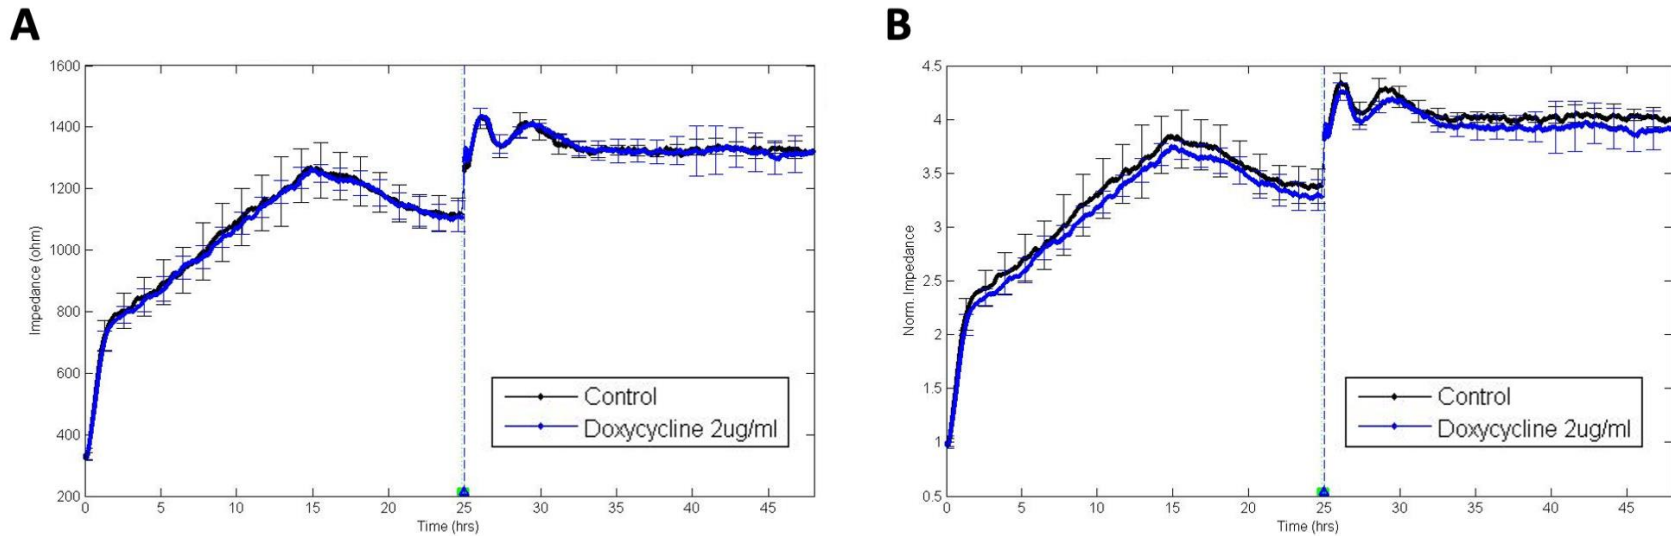

**Figure S4. Overexpressing  $\beta$ -catenin had no effect on basal permeability.** This experiment is a control for the experiment shown in Figure 5. HG HRECs stably expressing the tet-regulated expression plasmid encoding a constitutively activated mutant of  $\beta$ -catenin (Addgene 114281) were pre-treated with either vehicle (dH<sub>2</sub>O; black), or doxycycline (2 ug/ml; blue) for 3 days and then barrier function was monitored. At the 25-hour timepoint, cells received a media change and vehicle or doxycycline was added again. **(A)** and **(B)** show the data before and after normalization to the resistance at the 0 h time point.
