# Supplementary material for: The Role of the Wnt Pathway in VEGF/Anti-VEGF-Dependent Control of the Endothelial Cell Barrier
Source: PubMed Central journal article supplement — Invest Ophthalmol Vis Sci. 2021 Sep 20;62(12):17. doi: 10.1167/iovs.62.12.17 (PMC8458780; doi:10.1167/iovs.62.12.17), 2021-09-20
Supplement: iovs-62-12-17_s005.pdf [file iovs-62-12-17_s005.pdf]

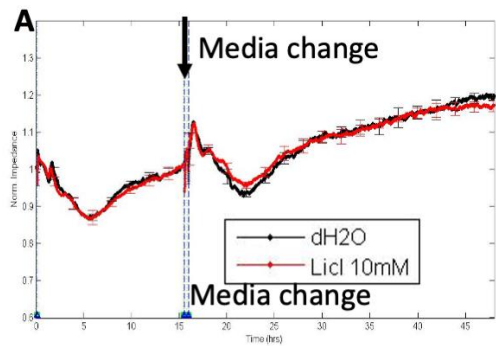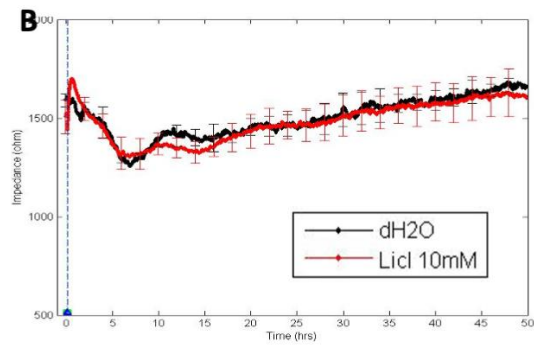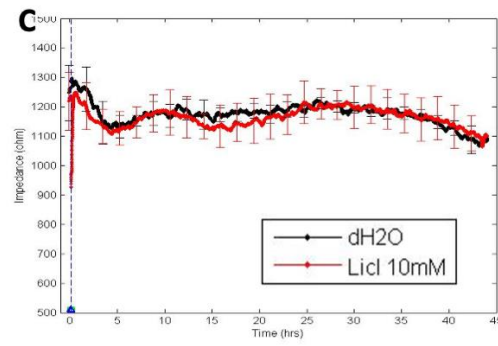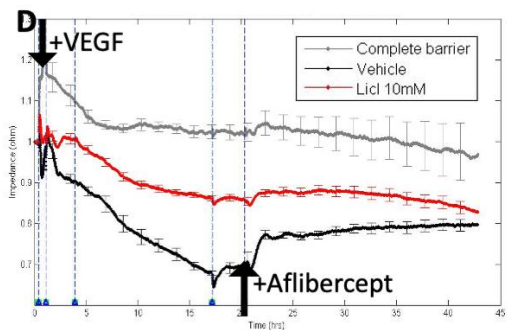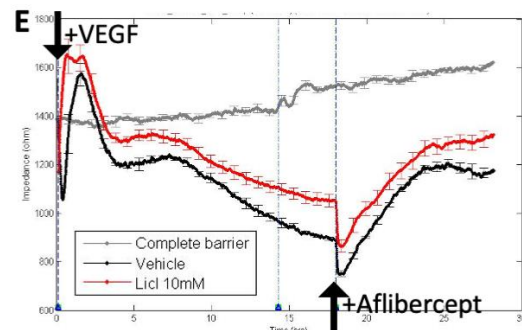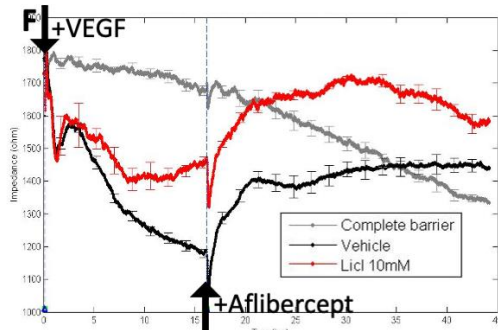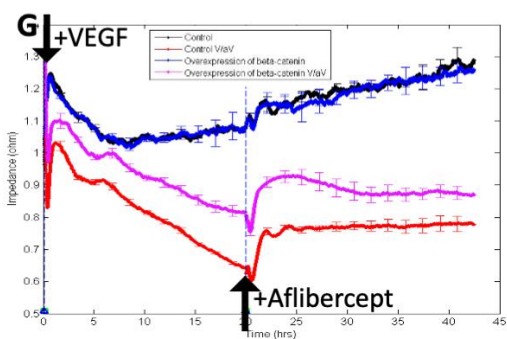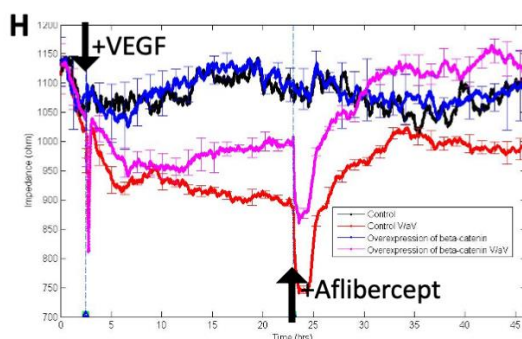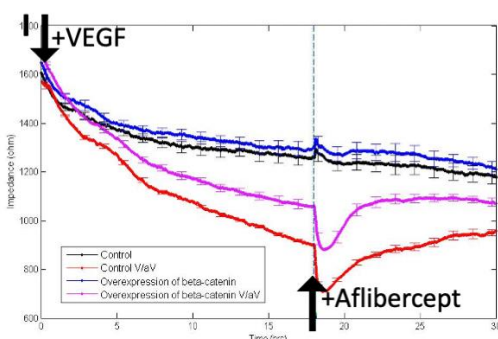

**Figure S5. Replicate experiments.**

Replicate experiments for Figs 2B, 3A and 5A are shown in panels A-C, D-F and G-I, respectively. The data presented are in ohms, whereas in Figs 2B, 3A and 5A the data are presented as normalized impedance.
